# Supplementary material for: Microbial population selection in integrated fixed-film sequencing batch reactors operated with different lengths of oxic and anoxic conditions
Source: Royal Society of Chemistry journal article supplement (doi:10.1039/d0ew01022g), 2021-01-01
Supplement: d0ew01022g1.pdf [file d0ew01022g1.pdf]

Fig. S1

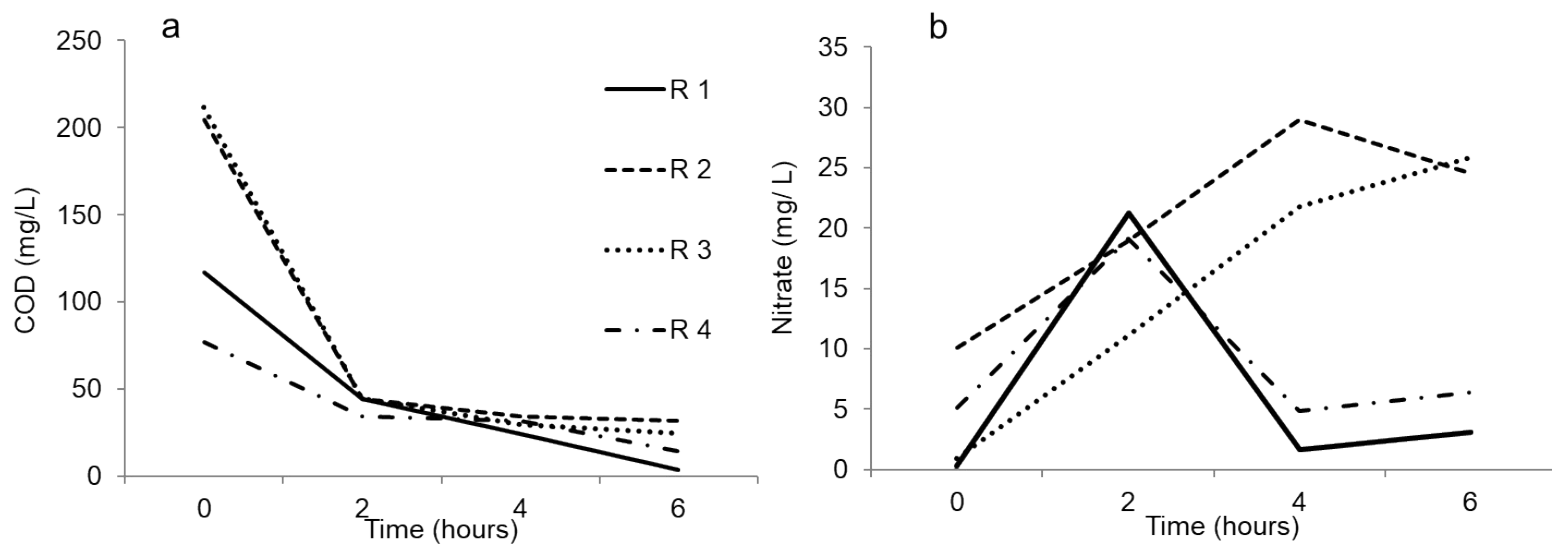

**Fig. S1.** Nutrient kinetics during an IF – SBRs operation: (a) COD removal and (b) nitrate accumulation and reduction.

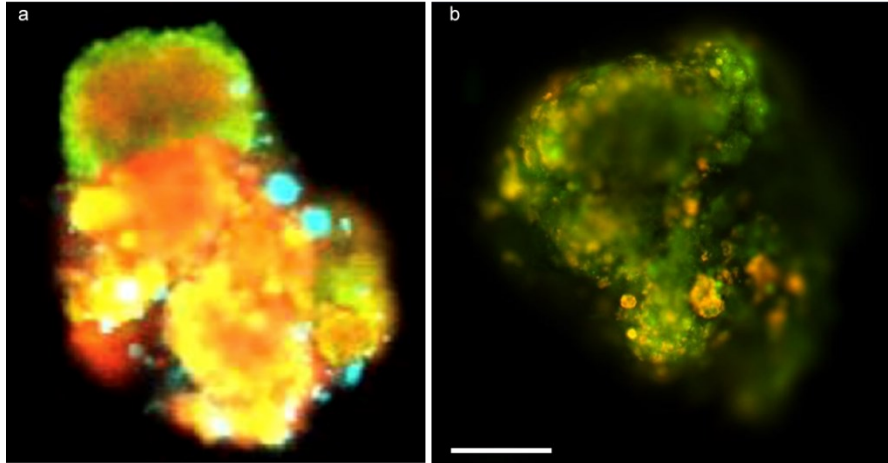

**Fig. S2.** CLSM images illustrating: (a) Distribution of EPS. Colors correspond to cyan ( $\beta$ -polysaccharides), red ( $\alpha$ -polysaccharide) and green (protein). Yellow (overlap of red and green, because it is a composite image). (b) Distribution of Live dead cells. Colors correspond to red (dead cells) and green (live cells). Scale = 200 $\mu$ .

**Table S1.** Spectral characteristics of the fluorescent probes.

| Probe                           | Ex/Em <sup>a</sup> (nm) | Scanned length <sup>b</sup> (nm) | Target                                                                      |
|---------------------------------|-------------------------|----------------------------------|-----------------------------------------------------------------------------|
| FITC                            | 488/517                 | 500 – 551                        | Proteins                                                                    |
| Concanavalin-A <sup>c</sup>     | 633/650                 | 633 – 700                        | $\alpha$ -mannopyranosyl and $\alpha$ -glucopyranosyl residues              |
| Soybean agglutinin              | 650/656                 | 646 – 674                        | $\alpha$ - and $\beta$ -N-acetylgalactosamine and galactopyranosyl residues |
| Wheat germ agglutinin           |                         |                                  | N- acetylglucosamine, N-acetylneuraminic                                    |
| Calcofluor White                | 355/433                 | 300 – 450                        | Cellulose                                                                   |
| Thiflavin T                     |                         |                                  | Amyloid adhesin                                                             |
| Anti CsgA antibody <sup>d</sup> | 488/517                 | 500 – 551                        | Amyloid adhesin                                                             |
| Syto 9                          | 482/500                 | 480 – 545                        | Live cells                                                                  |
| Propidium Iodide                | 510/580                 | 555 – 655                        | Dead cells                                                                  |

<sup>a</sup>Maximum excitation and emission length

<sup>b</sup>Emission length used for scanning

<sup>c</sup>Concanavalin-A conjugated with Alexa fluor 633

<sup>d</sup>CsgA conjugated with secondary antibody Alexa fluor 488
